# Supplementary material for: User Interface Designs of an Educational Mobile Application: A Study of Qiraat Teaching and Learning
Source: Hindawi journal article supplement (doi:10.1155/2021/6648550), 2021-05-03
Supplement: f1 [file 6648550.f1.zip]

Archive with 2 entries (2 files):
- 6648550.f1/AppendixA.docx
- 6648550.f1/AppendixB.docx
