# Supplementary material for: User Interface Designs of an Educational Mobile Application: A Study of Qiraat Teaching and Learning
Source: Hindawi journal article supplement (doi:10.1155/2021/6648550), 2021-05-03
Supplement: f1 [file 6648550.f1.zip › 6648550.f1/AppendixA.docx]

**APPENDIX A**

Instructions for using the functionalities provided in the Qiraat *Sab’ah* application.

1. On the Qiraat *Sab’ah* application, click the icon
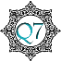
 on your phone and swipe to the left to launch the application.
2. Now, you can see the list of *surah* pages.
3. Click the icon
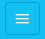
 located at the top left header.
4. There will be four options listed, namely: Surah, Imam, Help, and Exit.
5. Try all the options given and observe the content of it.
6. For the list of *surah* pages, click *surah Al-Fatehah Warsh*.
7. The green arrow icon located at the top is a shortcut to move to the next/reverse *surah*.
8. You can change the *Imam* by selecting the middle icon beneath the page. When you click the icon change *Imam,* it will display seven *Imam*s and fourteen *reciters* for you to choose from. You can choose any of them. However, if you don’t want to change it, click
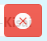
.
9. Play the *Surah Al-Fatehah* recited by two different Qiraat of *Imam Nafi* (*Warsh* and *Qolun*) from verses 1 till 7.
10. Next, choose one *Imam* of Qiraat from the icon change *Imam* of *surah Al-Fatehah* and recite it.
11. Next, click the button icon (with a green arrow) for the next *surah* (i.e., *Surah Al-Baqarah*).
12. Play the *Surah Al-Baqarah* recited by two different Qiraat of *Imam* that you have chosen before from verses 1 till 7.
13. Next, choose one *Imam* of Qiraat using the icon change *Imam* by selecting the middle icon beneath the page of *Surah Al-Baqarah,* and recite it.
14. Feel free to use the application and provide your feedback.
