# Supplementary material for: User Interface Designs of an Educational Mobile Application: A Study of Qiraat Teaching and Learning
Source: Hindawi journal article supplement (doi:10.1155/2021/6648550), 2021-05-03
Supplement: f1 [file 6648550.f1.zip › 6648550.f1/AppendixB.docx]

**APPENDIX B**

**USER PROFILE FORM**

**Section 1** ID: __________

1. Age 20-29 30-39 40-49 50 and above
2. Occupation?

Student Lecturer Other (please specify):____________

1. Do you know what is Qiraat?

Yes No

| If your answer is No, you may proceed to Section 2. |
| --- |

1. How frequently do you recite Qiraat in a week?

None

1-2 times

3-5 times

6-7 times

8 times and above

1. Which method(s) do you use to recite Qiraat? (You can select more than one)

Mobile application

Online (e.g: Youtube, websites and etc.)

Traditional method (Book)

Other (please specify): ______________________________

| If one of your answers is a mobile application, please proceed to Question (f) and (g). |
| --- |

1. Please name the Qiraat application that you have been using.

__________________________________________________________________

1. How frequently do you use the Qiraat application?

None

1-2 times a week

3-5 times a week

6-7 times a week

8 times and above a week

**Section 2**

1. For each statement below, please give your opinion on the usability of the Qiraat.

1: not relevant, 2: not useful, 3: no opinion, 4: useful, 5: very useful

| **Statement** | **Scale (1-5)** |
| --- | --- |
| 1. The information (such as the word highlighted, audio recitation etc.) provided with this application is clear and helpful in teaching and learning Qiraat. |  |
| 1. The application provides Qiraat references in guiding the user on the differences and rules of Qiraat. |  |
| 1. This application provides a self-studyexperience. |  |
| 1. Easy access to Qiraat *Imams* in one application. |  |
| 1. Enable to recite and learn Qiraat anytime and anywhere. |  |

1. Which of these two imams of Qiraat that you have selected?

Imam Nafi – Qolun

Imam Nafi – Warsh

Imam Ibn Kathir – Al Bazzi

Imam Ibn Kathir – Qunbul

Imam Ibn Amir – Hisham

Imam Ibn Amir – Ibn Dhakwan

Imam Abu Amr – Ad Duri

Imam Abu Amr – Al Susi

Imam Asim – Hafs

Imam Asim – Shu’ba

Imam Hamzah – Khalaf

Imam Hamzah – Khalad

Imam Kisai – Ad Duri

Imam Kisai – Abul Harith

1. Find the difference(s) in *Surah Al-Baqarah* verse 7 for the selected *Imams* in question 2 above.

خَتَمَ ٱللَّهُ عَلَىٰ قُلُوبِهِمۡ وَعَلَىٰ سَمۡعِهِمۡۖ وَعَلَىٰٓ أَبۡصَٰرِهِمۡ غِشَٰوَةٞۖ وَلَهُمۡ عَذَابٌ عَظِيمٞ ٧

خَتَمَ ٱللَّهُ عَلَىٰ قُلُوبِهِمۡ وَعَلَىٰ سَمۡعِهِمۡۖ وَعَلَىٰٓ أَبۡصِٰرِهِمۡ غِشَٰوَةٞۖ وَلَهُمۡ عَذَابٌ عَظِيمٞ ٧

خَتَمَ ٱللَّهُ عَلَىٰ قُلُوبِهِمُو وَعَلَىٰ سَمۡعِهِمُوۖ وَعَلَىٰٓ أَبۡصَٰرِهِمُو غِشَٰوَةٞۖ وَلَهُمُو عَذَابٌ عَظِيمٞ ٧

خَتَمَ ٱللَّهُ عَلَىٰ قُلُوبِهِمۡ وَعَلَىٰ سَمۡعِهِمۡۖ وَعَلَىٰٓ أَبۡصَٰرِهِمۡ غِشَٰوَةٞۖ وَّلَهُمۡ عَذَابٌ عَظِيمٞ٧

None

1. Please indicate for each design, whether it does or does not help you in learning Qiraat. (tick only one for each statement)

|  | **Yes** | **No** |
| --- | --- | --- |
| 1. The design of this application is convenient to use for learning Qiraat through a mobile application. |  |  |
| 1. The pronunciation provided in the application will help you to learn how to recite the Qiraat properly. |  |  |
| 1. The audio can be followed based on the Qiraat rules. |  |  |
| 1. The *rawi’s* button located at the bottom of the application help you to keep track of the location in this application. |  |  |
| 1. The exchange of *rasm* (written) form of Qiraat for example (صِرَطَ) for Imam Asim and (سِرَطَ) for Imam Qunbul will help you to understand how the recitation should be followed. |  |  |
| 1. The title of *Imam* located at top right corner help you to track which Imam is reciting the Qiraat. |  |  |
| 1. The description available (i.e. *Imam* description and rules) in the application help you to understand how to recite according to Imam as well as the rules associated with it. |  |  |
| 1. The word highlighted in yellow colour helps you to learn different Qiraat *Imam* rules. |  |  |
| 1. This application is intuitive and user-friendly |  |  |

1. For each statement below, please indicate your agreement or disagreement (tick only one for each statement).

|  | **Yes** | **No** |
| --- | --- | --- |
| 1. This application encourages practice and learning of Qiraat with your friends. |  |  |
| 1. This application can act as a supplementary teaching and learning material for Qiraat study. |  |  |
| 1. This application attracts my interest in learning Qiraat. |  |  |
| 1. This application increases my understanding and improved my pronunciations in Qiraat. |  |  |
| 1. I would like to use this application if it is available. |  |  |
| 1. Overall, I would recommend this application to my friends who wish to learn Qiraat. |  |  |

1. What do you see as the strength(s) of this application?

______________________________________________________________________________________________________________________________________________________

1. What do you see as the weakness(es) of this application?

______________________________________________________________________________________________________________________________________________________

1. Any other comments?

______________________________________________________________________________________________________________________________________________________

| Thank you for your valuable comments and feedback. |
| --- |
